# Supplementary material
Source: Royal Society of Chemistry journal article supplement (doi:10.1039/d6nj01838f)
Supplement: d6nj01838f1.pdf [file d6nj01838f1.pdf]

## Electronic Supplementary Information

for

# Fragment-LEGO Strategy toward Seven-Ring-Fused Acceptors for Organic Solar Cells

Yuqian Cai,<sup>†</sup> Rui Zhu,<sup>†</sup> Lina Yin, Zhangyuan Wang, and Hongguang Liu\*

College of Chemistry and Materials Science, Jinan University, 601 Huang-Pu Avenue West,  
Guangzhou 510632, China.

<sup>†</sup> These authors contribute equally to this work.

\* E-mail: hongguang\_liu@jnu.edu.cn

### Computational details

The Generalized Mulliken-Hush model is used to calculate the charge-transfer integral ( $V_{DA}$ ):<sup>1</sup>

$$V_{DA} = \frac{\mu_{tr}\Delta E}{\sqrt{(\Delta\mu)^2 + 4(\mu_{tr})^2}} \#(S1)$$

where  $\Delta E$  is the energy difference between the initial state and the final state;  $\mu_{tr}$  is the transition dipole moment;  $\Delta\mu$  denotes the change of dipole moment, which is calculated by using the Hellmann-Feynman theorem.<sup>2</sup>

The total charge reorganization energy ( $\lambda$ ) is composed of the internal reorganization energy ( $\lambda_{in}$ ) and the external reorganization energy ( $\lambda_{ext}$ ):

$$\lambda = \lambda_{in} + \lambda_{ext} \#(S2)$$

$\lambda_{in}$  refers to the energy change caused by the structural relaxation when an electron is added to or removed from the molecule;  $\lambda_{ext}$  accounts for the energy change induced by the structural relaxation in the surrounding media due to polarization effects. The  $\lambda_{in}$  is calculated using the following equations:<sup>3</sup>

$$\lambda_{in} = \lambda_{in}(A) + \lambda_{in}(D) \#(S3)$$

$$\lambda_{in}(A) = E(A^-) - E(A) \#(S4)$$

$$\lambda_{in}(D) = E(D) - E(D^+) \quad (S5)_w$$

here  $\lambda_{in}(A)$  and  $\lambda_{in}(D)$  denote the internal reorganization energies for the acceptor and the donor, respectively;  $E(A^-)$  and  $E(A)$  represent the neutral-state energies of the acceptor at the optimized anionic structure and the optimized neutral structure, respectively;  $E(D)$  and  $E(D^+)$  represent the cationic-state energies of the donor at the optimized neutral structure and the optimized cationic structure, respectively. It is worthy to note that using quantum mechanical method to compute  $\lambda_{ext}$  is still challenging and  $\lambda_{ext}$  can be best estimated only when the material solid-state structure is available. Therefore, in line with the study carried out by Kuss-Petermann et al. on D-A systems,<sup>4</sup> we treat  $\lambda_{ext}$  as a constant ( $\lambda_{ext} = 1.1$  eV) in this work.

The change of the Gibbs free energy in the charge recombination process ( $\Delta G_{CR}$ ) can be estimated by the following formula:<sup>5</sup>

$$\Delta G_{CR} = E_{IP}(D) - E_{EA}(A) \#(S6)$$

where  $E_{IP}(D)$  is the ionization potential of the donor, and  $E_{EA}(A)$  represents the electron affinity of the acceptor. The change of the Gibbs free energy in the charge separation process ( $\Delta G_{CS}$ ) can be calculated by the Rehm-Weller equation:<sup>6</sup>

$$\Delta G_{CS} = -\Delta G_{CR} - E_{S1} - E_b^{DA} \#(S7)$$

where  $E_{S1}$  is the first excited state energy of the free donor-based polymer; The exciton binding energy ( $E_b^{DA}$ ) at the lowest ICT of acceptor is calculated by the following formula:<sup>7</sup>

$$E_b^{DA} = E_{IP} - E_{EA} - E_{opt} \#(S8)$$

where  $E_{IP}$  is the ionization potential,  $E_{EA}$  is the electron affinity, and  $E_{opt}$  is the optical energy gap of a D-A pair.

**Table. S1** Experimental and RR-predicted (in parenthesis) parameters for collected 144 binary OSC

| Number | Donor | Acceptor             | PCE (%)          | J <sub>sc</sub> (mA.cm <sup>-2</sup> ) | V <sub>oc</sub> (V) | FF (%)        | Reference                                |
|--------|-------|----------------------|------------------|----------------------------------------|---------------------|---------------|------------------------------------------|
| 1      | PM6   | ITIC                 | 10.30<br>(10.2)  | 15.60<br>(16.24)                       | 1.01<br>(0.97)      | 66<br>(64.54) | Adv. Energy Mater. 2018, 8, 1802131      |
| 2      | PBDBT | ITIC                 | 8.37<br>(9.64)   | 15.28<br>(15.61)                       | 0.85<br>(0.94)      | 63<br>(65.56) | J. Mater. Chem. A 2018, 6, 395-403       |
| 3      | PBDBT | IO-4F                | 8.06<br>(11.46)  | 12.20<br>(17.79)                       | 1.05<br>(0.89)      | 63<br>(71.23) | J. Phys. Chem. C 2020, 124, 7691-7698    |
| 4      | PM6   | ITCPTC               | 12.30<br>(11.76) | 17.10<br>(17.88)                       | 0.97<br>(0.94)      | 74<br>(70.09) | Energy Environ. Sci. 2018, 11, 3275-3282 |
| 5      | PM6   | ITC-2Cl              | 13.60<br>(11.56) | 20.10<br>(17.82)                       | 0.91<br>(0.94)      | 74<br>(68.99) | Adv. Energy Mater. 2019, 9, 1900041      |
| 6      | PM6   | ITC-2Br <sub>2</sub> | 13.10<br>(11.48) | 19.80<br>(17.77)                       | 0.90<br>(0.94)      | 74<br>(68.99) | Nano Energy 2019, 66, 104146             |
| 7      | PM6   | MeIC                 | 13.00<br>(11.61) | 18.50<br>(17.63)                       | 0.99<br>(0.96)      | 71<br>(68.62) | Energy Environ. Sci. 2018, 11, 3275-3282 |
| 8      | PBDBT | ITCT-DM              | 10.60<br>(10.42) | 17.40<br>(16.52)                       | 0.90<br>(0.92)      | 65<br>(67.83) | Adv. Energy Mater. 2018, 8, 1800204      |
| 9      | PBDBT | IDTC                 | 11.10<br>(10.68) | 16.10<br>(16.63)                       | 1.00<br>(0.93)      | 69<br>(69.01) | Nanoscale 2020, 12, 12928-12941          |
| 10     | PM6   | ITC-2Br              | 10.90<br>(11.11) | 15.40<br>(17.04)                       | 1.03<br>(0.96)      | 69<br>(68.16) | Nano Energy 2019, 66, 104146             |
| 11     | PM6   | ITC-2BrI             | 11.90<br>(11.28) | 16.60<br>(17.24)                       | 1.01<br>(0.96)      | 71<br>(68.49) | Nano Energy 2019, 66, 104146             |
| 12     | PBDBT | IDTTC                | 13.50            | 18.30                                  | 1.01                | 73            | Nanoscale 2020,                          |

|    |       |             |                  |                  |                |               |                                                                   |
|----|-------|-------------|------------------|------------------|----------------|---------------|-------------------------------------------------------------------|
|    |       |             | (11.08)          | (17.00)          | (0.93)         | (69.68)       | 12, 12928-12941                                                   |
| 13 | PBDBT | IDTTTC      | 6.46<br>(9.91)   | 14.50<br>(16.26) | 1.03<br>(0.93) | 43<br>(64.68) | Nanoscale 2020,<br>12, 12928-12941                                |
| 14 | PM6   | ITTBC       | 6.83<br>(10.06)  | 12.50<br>(16.23) | 0.86<br>(0.93) | 63<br>(66.49) | Dyes Pigm. 2020,<br>180, 108452                                   |
| 15 | PBDBT | IDTTIC      | 11.20<br>(9.85)  | 17.30<br>(16.08) | 0.92<br>(0.92) | 70<br>(65.98) | Adv. Funct.<br>Mater. 2018, 28,<br>1802895                        |
| 16 | PM6   | POIT-IC     | 10.10<br>(10.51) | 16.10<br>(16.79) | 1.04<br>(0.97) | 60<br>(64.18) | Sol. RRL 2019, 3,<br>1900169                                      |
| 17 | PBDBT | ITIC-OE     | 8.50<br>(9.4)    | 14.80<br>(15.67) | 0.85<br>(0.91) | 67<br>(65.48) | J. Mater. Chem. A<br>2018, 6, 395-403                             |
| 18 | PBDBT | m-ITIC-O-H  | 9.55<br>(9.58)   | 16.00<br>(15.87) | 0.85<br>(0.91) | 70<br>(65.98) | Adv. Energy<br>Mater. 2019, 9,<br>1900044                         |
| 19 | PBDBT | m-ITIC-O-EH | 9.77<br>(9.61)   | 15.90<br>(15.85) | 0.88<br>(0.92) | 68<br>(65.65) | Adv. Energy<br>Mater. 2019, 9,<br>1900044                         |
| 20 | PBDBT | m-F-ITIC    | 8.98<br>(9.47)   | 15.80<br>(15.83) | 0.88<br>(0.92) | 64<br>(64.98) | J. Mater. Chem. A<br>2019, 7, 18468-<br>18479                     |
| 21 | PBDBT | o-F-ITIC    | 11.10<br>(9.84)  | 18.10<br>(16.2)  | 0.92<br>(0.92) | 67<br>(65.48) | J. Mater. Chem. A<br>2019, 7, 18468-<br>18479                     |
| 22 | PBDBT | ITC6-IC     | 10.90<br>(9.64)  | 16.20<br>(15.61) | 0.94<br>(0.94) | 71<br>(65.56) | J. Mater. Chem. A<br>2020, 8, 22907-<br>22917                     |
| 23 | PM6   | POIT-IC2F   | 12.40<br>(11.62) | 18.60<br>(18.03) | 0.97<br>(0.95) | 69<br>(67.86) | Sol. RRL 2019, 3,<br>1900169                                      |
| 24 | PM6   | POIT-IC4F   | 13.80<br>(12.33) | 20.90<br>(19.15) | 0.91<br>(0.92) | 73<br>(69.85) | Sol. RRL 2019, 3,<br>1900169                                      |
| 25 | PM6   | ITThBC      | 7.59<br>(9.6)    | 13.40<br>(15.95) | 0.87<br>(0.91) | 65<br>(65.92) | Dyes Pigm. 2020,<br>180, 108452                                   |
| 26 | PM6   | ITzN-C9     | 9.51<br>(10.55)  | 14.10<br>(16.74) | 1.05<br>(0.95) | 64<br>(66.63) | Proc. Natl. Acad.<br>Sci. U. S. A. 2018,<br>115, E8341-E8348      |
| 27 | PM6   | ITzN-F4     | 10.90<br>(10.78) | 17.50<br>(17.3)  | 0.92<br>(0.93) | 68<br>(67.3)  | Adv. Energy<br>Mater. 2020, 10,<br>2000635.                       |
| 28 | PM6   | ITN-C9      | 9.33<br>(9.88)   | 15.70<br>(16.4)  | 0.92<br>(0.93) | 65<br>(65.3)  | Proc. Natl. Acad.<br>Sci. U. S. A. 2018,<br>115, E8341-<br>E8348. |
| 29 | PM6   | ITN-F4      | 10.70            | 19.60            | 0.82           | 67            | Adv. Energy                                                       |

|    |       |          |                  |                  |                |               |                                                     |
|----|-------|----------|------------------|------------------|----------------|---------------|-----------------------------------------------------|
|    |       |          | (10.91)          | (18.11)          | (0.91)         | (67.04)       | Mater. 2020, 10,<br>2000635.                        |
| 30 | PBDBT | IDTT-OBH | 10.90<br>(9.86)  | 17.50<br>(17.3)  | 0.87<br>(0.89) | 72<br>(67.65) | J. Mater. Chem. A<br>2018, 6, 8586-<br>8594         |
| 31 | PBDBT | ITC-4F   | 10.50<br>(11.12) | 18.60<br>(18.3)  | 0.78<br>(0.86) | 73<br>(70.58) | J. Mater. Chem. A<br>2020, 8, 22907-<br>22917       |
| 32 | PM6   | IM-4F    | 14.20<br>(13.29) | 22.10<br>(20.79) | 0.88<br>(0.9)  | 73<br>(70.83) | Chem. Mater.<br>2020, 32, 1297-<br>1307             |
| 33 | PM6   | IOM-4F   | 13.40<br>(13.15) | 21.70<br>(20.72) | 0.86<br>(0.9)  | 72<br>(70.66) | Chem. Mater.<br>2020, 32, 1297-<br>1307             |
| 34 | PM6   | SeTIC    | 7.46<br>(10.37)  | 15.50<br>(17.35) | 0.95<br>(0.94) | 51<br>(64.02) | ACS Energy Lett.<br>2018, 3, 2967-<br>2976          |
| 35 | PM6   | BDSelC   | 7.10<br>(9.30)   | 14.00<br>(15.76) | 0.97<br>(0.94) | 52<br>(62.55) | Sol. RRL 2018,<br>1800250                           |
| 36 | PBDBT | BPIC     | 10.70<br>(9.82)  | 17.90<br>(17.03) | 0.88<br>(0.9)  | 68<br>(63.99) | Sol. RRL 2019, 3,<br>1900262                        |
| 37 | PBDBT | BDTIC    | 12.10<br>(11.20) | 20.00<br>(18.9)  | 0.88<br>(0.89) | 68<br>(66.44) | Chin. J. Polym.<br>Sci. 2021, 39, 35-<br>42         |
| 38 | PBDBT | DBTIC    | 9.66<br>(9.98)   | 15.50<br>(16.87) | 1.00<br>(0.94) | 62<br>(63)    | J. Mater. Chem. A<br>2019, 7, 9609-<br>9617         |
| 39 | PBDBT | Y1       | 13.40<br>(11.97) | 22.40<br>(20.2)  | 0.87<br>(0.9)  | 69<br>(65.95) | Nat. Commun.<br>2019, 10, 570                       |
| 40 | PBDBT | Y16      | 13.00<br>(11.63) | 21.30<br>(20.53) | 0.91<br>(0.87) | 67<br>(65.3)  | J. Mater. Chem. A<br>2019, 7, 7843-<br>7851         |
| 41 | PBDBT | Y9       | 13.30<br>(12.67) | 23.30<br>(21.77) | 0.90<br>(0.88) | 63<br>(65.57) | J. Energy Chem.<br>2020, 42, 169-173                |
| 42 | PBDBT | Y5       | 14.10<br>(12.38) | 22.80<br>(20.91) | 0.88<br>(0.87) | 70<br>(67.12) | Adv. Mater. 2019,<br>31, 1807577                    |
| 43 | PM6   | BTP      | 8.85<br>(13.18)  | 16.30<br>(22.04) | 0.96<br>(0.91) | 57<br>(65.13) | Appl. Mater.<br>Interfaces 2020,<br>12, 50541-50549 |
| 44 | PM6   | Y6       | 14.87<br>(15.00) | 24.91<br>(24.4)  | 0.84<br>(0.86) | 71<br>(70.8)  | Appl. Mater.<br>Interfaces 2020,<br>12, 50541-50549 |
| 45 | PM6   | Y6-C3    | 13.80<br>(14.20) | 24.10<br>(23.63) | 0.83<br>(0.84) | 67<br>(70.36) | Sci. China: Chem.<br>2020, 63, 361-369              |

|    |     |                           |                  |                  |                |               |                                                         |
|----|-----|---------------------------|------------------|------------------|----------------|---------------|---------------------------------------------------------|
| 46 | PM6 | BTP-PhC6                  | 11.10<br>(13.92) | 21.30<br>(23.2)  | 0.84<br>(0.86) | 62<br>(69.44) | Org. Electron.<br>2020, 87, 105963                      |
| 47 | PM6 | DTY6                      | 16.30<br>(14.79) | 25.30<br>(23.87) | 0.86<br>(0.86) | 75<br>(71.6)  | Joule 2020, 4,<br>2004-2016                             |
| 48 | PM6 | BTPD-4F                   | 16.20<br>(14.74) | 24.80<br>(23.96) | 0.82<br>(0.84) | 76<br>(71.54) | J. Mater. Chem. A<br>2020, 8, 23239-<br>23247           |
| 49 | PM6 | BTP-PhC6                  | 16.70<br>(14.98) | 25.00<br>(23.98) | 0.87<br>(0.86) | 77<br>(72.28) | Nano Energy<br>2020, 76, 105087                         |
| 50 | PM6 | BTP-C6Ph                  | 15.50<br>(14.78) | 24.30<br>(23.86) | 0.84<br>(0.85) | 76<br>(72.12) | Nano Energy<br>2020, 76, 105087                         |
| 51 | PM6 | N-C1BTP-C12-<br>4Cl       | 12.90<br>(14.02) | 21.50<br>(22.81) | 0.85<br>(0.85) | 71<br>(71.74) | Joule 2019, 3,<br>3020-3033                             |
| 52 | PM6 | BTP-Cl                    | 16.50<br>(14.70) | 25.40<br>(24.33) | 0.87<br>(0.85) | 75<br>(70.72) | Nat. Commun.<br>2019, 10, 2515                          |
| 53 | PM6 | BTIC-Cl2-Cl               | 11.40<br>(13.72) | 19.80<br>(22.9)  | 0.84<br>(0.85) | 68<br>(70.37) | J. Mater. Chem. A<br>2020, 8, 8903-<br>8912             |
| 54 | PM6 | BTPS-4Cl                  | 13.50<br>(14.44) | 24.00<br>(23.9)  | 0.8<br>(0.83)  | 68<br>(71.46) | J. Mater. Chem. A<br>2020, 8, 23239-<br>23247           |
| 55 | PM6 | BT <sub>6</sub> IC-BO-4Cl | 14.40<br>(14.61) | 23.60<br>(23.99) | 0.84<br>(0.83) | 73<br>(73.05) | ACS Appl. Mater.<br>Interfaces 2020,<br>12, 28329-28336 |
| 56 | PM6 | BT <sub>6</sub> IC-HD-4Cl | 14.90<br>(14.37) | 23.40<br>(23.43) | 0.88<br>(0.84) | 73<br>(72.72) | ACS Appl. Mater.<br>Interfaces 2020,<br>12, 28329-28336 |
| 57 | PM6 | BT <sub>6</sub> IC-OD-4Cl | 9.60<br>(12.56)  | 18.60<br>(21.67) | 0.89<br>(0.84) | 58<br>(68.48) | ACS Appl. Mater.<br>Interfaces 2020,<br>12, 28329-28336 |
| 58 | PM6 | BTIC-4Br                  | 12.20<br>(13.79) | 20.70<br>(23.27) | 0.85<br>(0.86) | 70<br>(68.64) | Adv. Sci. 2020, 7,<br>1903784                           |
| 59 | PM6 | BTPC-BO-4Br               | 14.00<br>(14.74) | 24.10<br>(24.17) | 0.86<br>(0.86) | 68<br>(71.23) | Adv. Sci. 2020, 7,<br>1903784.                          |
| 60 | PM6 | BTPOC-2Br-5               | 14.00<br>(14.11) | 22.90<br>(23.12) | 0.90<br>(0.89) | 68<br>(68.49) | J. Mater. Chem. A<br>2020, 8, 25101-<br>25108           |
| 61 | PM6 | BTPOC-2Br-6               | 15.00<br>(14.28) | 24.10<br>(23.32) | 0.87<br>(0.88) | 71<br>(68.99) | J. Mater. Chem. A<br>2020, 8, 25101-<br>25108           |
| 62 | PM6 | LY-Cl-1                   | 14.40<br>(13.70) | 24.30<br>(22.73) | 0.91<br>(0.89) | 65<br>(67.45) | Energy Environ.<br>Sci. 2020, 13,<br>5028-5038          |
| 63 | PM6 | LY-Cl-2                   | 15.20            | 24.20            | 0.88           | 71            | Energy Environ.                                         |

|    |       |           |                  |                  |                |               |                                                     |
|----|-------|-----------|------------------|------------------|----------------|---------------|-----------------------------------------------------|
|    |       |           | (14.49)          | (23.68)          | (0.88)         | (69.58)       | Sci. 2020, 13,<br>5028-5038                         |
| 64 | PM6   | BTP-ClBr  | 16.80<br>(15.37) | 23.50<br>(23.97) | 0.91<br>(0.89) | 79<br>(72.48) | Adv. Energy<br>Mater. 2020, 10,<br>2002649          |
| 65 | PM6   | BTP-ClBr2 | 15.50<br>(15.15) | 25.00<br>(24.22) | 0.85<br>(0.88) | 74<br>(71.65) | Adv. Energy<br>Mater. 2020, 10,<br>2002649          |
| 66 | PM6   | BTP-IS    | 12.80<br>(13.04) | 22.60<br>(22.03) | 0.89<br>(0.87) | 64<br>(67.08) | Appl. Mater.<br>Interfaces 2020,<br>12, 49659-49665 |
| 67 | PM6   | Y6-2Se    | 14.60<br>(14.63) | 24.30<br>(23.86) | 0.83<br>(0.85) | 70<br>(71.12) | J. Mater. Chem. A<br>2020, 8, 23756-<br>23765       |
| 68 | PM6   | Y1-4F     | 13.24<br>(14.35) | 24.10<br>(23.19) | 0.81<br>(0.88) | 66<br>(70.6)  | Adv. Mater. 2019,<br>31, 1904215                    |
| 69 | PM6   | Y18       | 16.02<br>(14.01) | 24.91<br>(23.52) | 0.84<br>(0.85) | 76<br>(69.95) | Energy Environ.<br>Sci. 2020, 13,<br>2459-2466      |
| 70 | PBDBT | Y18-DMO   | 14.20<br>(13.15) | 24.00<br>(22.39) | 0.81<br>(0.81) | 73<br>(71.41) | ACS Appl. Energy<br>Mater. 2020, 3,<br>11981-11991  |
| 71 | PM6   | Y19       | 12.80<br>(13.71) | 22.40<br>(23.45) | 0.84<br>(0.83) | 68<br>(69.87) | J. Cent. South<br>Univ. 2020, 27,<br>3581-3593      |
| 72 | PM6   | Y15       | 14.10<br>(14.75) | 23.80<br>(24.69) | 0.88<br>(0.85) | 69<br>(70.13) | Chin. Chem. Lett.<br>2019, 30, 2343-<br>2346        |
| 73 | PBDBT | Y2        | 13.40<br>(13.53) | 23.60<br>(21.84) | 0.82<br>(0.87) | 69<br>(71.51) | Nat. Commun.<br>2019, 10, 570                       |
| 74 | PM6   | AQx-2     | 16.60<br>(14.65) | 25.40<br>(23.51) | 0.86<br>(0.88) | 76<br>(70.59) | Adv. Mater. 2020,<br>32, 1906324                    |
| 75 | PM6   | AQx-1     | 13.30<br>(14.10) | 22.20<br>(22.98) | 0.89<br>(0.88) | 67<br>(69.09) | Adv. Mater. 2020,<br>32, 1906324                    |
| 76 | PM6   | BP-4F     | 13.90<br>(12.59) | 21.60<br>(20.24) | 0.90<br>(0.89) | 72<br>(69.7)  | J. Mater. Chem. A<br>2019, 7, 24366-<br>24373       |
| 77 | PM6   | HBDT-4Cl  | 10.40<br>(11.79) | 17.80<br>(19.58) | 0.90<br>(0.88) | 65<br>(69.4)  | J. Mater. Chem. A<br>2019, 7, 20274-<br>20284       |
| 78 | PM6   | FBDT-4Cl  | 12.40<br>(12.09) | 19.80<br>(19.88) | 0.89<br>(0.87) | 70<br>(69.3)  | J. Mater. Chem. A<br>2019, 7, 20274-<br>20284       |
| 79 | PM6   | ClBDT-4Cl | 11.70            | 19.00            | 0.88           | 70            | J. Mater. Chem. A                                   |

|    |       |                                  |                  |                  |                |               |                                           |
|----|-------|----------------------------------|------------------|------------------|----------------|---------------|-------------------------------------------|
|    |       |                                  | (11.97)          | (19.75)          | (0.87)         | (69.3)        | 2019, 7, 20274-20284                      |
| 80 | PM6   | DPBT-4Cl                         | 11.40<br>(11.9)  | 19.20<br>(19.95) | 0.90<br>(0.87) | 66<br>(68.55) | Nano Energy<br>2020, 67, 104209           |
| 81 | PM6   | NCBDT-4Cl                        | 12.00<br>(12.02) | 20.10<br>(19.93) | 0.83<br>(0.86) | 72<br>(69.63) | J. Mater. Chem. C<br>2020, 8, 15135-15141 |
| 82 | PM6   | POBDT-4Cl                        | 12.60<br>(12.12) | 21.00<br>(20.08) | 0.88<br>(0.87) | 68<br>(68.97) | Nano Energy<br>2020, 67, 104209           |
| 83 | PM6   | COBDT-4Cl                        | 13.50<br>(12.27) | 21.8<br>(20.22)  | 0.87<br>(0.87) | 71<br>(69.47) | Nano Energy<br>2020, 67, 104209           |
| 84 | PM6   | TOBDT                            | 11.30<br>(11.9)  | 18.70<br>(19.7)  | 0.89<br>(0.87) | 68<br>(68.97) | Adv. Funct. Mater. 2020, 30, 1909535      |
| 85 | PBDBT | BPIC-2Cl                         | 12.20<br>(11.13) | 20.70<br>(18.67) | 0.81<br>(0.91) | 72<br>(68.44) | Sol. RRL 2019, 3, 1900262                 |
| 86 | PM6   | BDT <sub>c</sub> IC- $\gamma$ Cl | 7.61<br>(10.46)  | 13.80<br>(17.55) | 0.89<br>(0.89) | 62<br>(65.24) | Mater. Chem. Front. 2021, 5, 1486-1494    |
| 87 | PBDBT | BTTIC-0M                         | 11.90<br>(11.45) | 19.00<br>(18.29) | 0.86<br>(0.91) | 73<br>(70.39) | J. Mater. Chem. A<br>2019, 7, 6809-6817   |
| 88 | PM6   | BDTSF-IC                         | 13.10<br>(12.24) | 20.40<br>(19.44) | 0.90<br>(0.90) | 72<br>(69.61) | Sol. RRL 2020, 4, 2000071                 |
| 89 | PBDBT | BTTIC-2M                         | 13.20<br>(11.3)  | 19.40<br>(18.05) | 0.90<br>(0.90) | 75<br>(68.92) | J. Mater. Chem. A<br>2019, 7, 6809-6817   |
| 90 | PBDBT | BTTIC-4M                         | 9.60<br>(10.67)  | 15.70<br>(17.58) | 0.97<br>(0.90) | 64<br>(67.1)  | J. Mater. Chem. A<br>2019, 7, 6809-6817   |
| 91 | PBDBT | BTTIC-TT                         | 13.40<br>(11.7)  | 19.60<br>(18.57) | 0.92<br>(0.89) | 74<br>(69.57) | Adv. Funct. Mater. 2019, 29, 1902155      |
| 92 | PBDBT | BTTIC-Ph                         | 9.14<br>(11.23)  | 16.50<br>(18.41) | 0.93<br>(0.89) | 60<br>(68.07) | Adv. Funct. Mater. 2019, 29, 1902155      |
| 93 | PBDBT | TOIC                             | 11.00<br>(11.58) | 18.60<br>(18.64) | 0.86<br>(0.87) | 68<br>(69.69) | Adv. Funct. Mater. 2018, 28, 1803128      |
| 94 | PBDBT | TOIPC                            | 9.31<br>(10.82)  | 15.20<br>(17.85) | 0.88<br>(0.88) | 70<br>(69.22) | J. Mater. Chem. C<br>2019, 7, 10111-10118 |
| 95 | PM6   | M36                              | 16.00<br>(14.17) | 24.60<br>(22.61) | 0.90<br>(0.87) | 72<br>(70.85) | Natl. Sci. Rev. 2020, 7, 1886-            |

|     |       |           |                  |                  |                |               |                                         |
|-----|-------|-----------|------------------|------------------|----------------|---------------|-----------------------------------------|
|     |       |           |                  |                  |                |               | 1895                                    |
|     |       |           |                  |                  |                |               | Natl. Sci. Rev.                         |
| 96  | PM6   | M38       | 8.89<br>(11.82)  | 18.30<br>(20.34) | 0.87<br>(0.88) | 56<br>(65.62) | 2020, 7, 1886-<br>1895                  |
|     |       |           |                  |                  |                |               | J. Mater. Chem. A                       |
| 97  | PM6   | M4        | 14.80<br>(13.90) | 23.40<br>(22.24) | 0.88<br>(0.83) | 72<br>(70.58) | 2020, 8, 24543-<br>24552                |
|     |       |           |                  |                  |                |               | Chem. Mater.                            |
| 98  | PBDBT | SRID-4F   | 13.10<br>(12.09) | 20.20<br>(19.6)  | 0.85<br>(0.85) | 75<br>(73.04) | 2019, 31, 6770-<br>6778                 |
|     |       |           |                  |                  |                |               | Chem. Mater.                            |
| 99  | PBDBT | TRID-4F   | 12.30<br>(11.63) | 18.50<br>(19.08) | 0.89<br>(0.85) | 75<br>(70.72) | 2019, 31, 6770-<br>6778                 |
|     |       |           |                  |                  |                |               | Sol. RRL 2020, 4,                       |
| 100 | PM6   | TSeIC-4Cl | 11.10<br>(12.35) | 20.90<br>(20.16) | 0.74<br>(0.86) | 72<br>(71.93) | 2000212                                 |
|     |       |           |                  |                  |                |               | Sol. RRL 2020, 4,                       |
| 101 | PM6   | TSeIC-4Br | 11.90<br>(11.44) | 21.30<br>(10.1)  | 0.77<br>(0.87) | 72<br>(69.86) | 2000212                                 |
|     |       |           |                  |                  |                |               | ACS Energy Lett.                        |
| 102 | PM6   | SeTIC4Cl  | 13.30<br>(11.89) | 22.90<br>(19.64) | 0.78<br>(0.89) | 75<br>(69.61) | 2018, 3, 2967-<br>2976                  |
|     |       |           |                  |                  |                |               | J. Mater. Chem. A                       |
| 103 | PM6   | TSeTIC    | 13.70<br>(12.40) | 19.40<br>(19.51) | 0.93<br>(0.89) | 76<br>(71.9)  | 2019, 7, 24389-<br>24399                |
|     |       |           |                  |                  |                |               | Sol. RRL 2018,                          |
| 104 | PM6   | BDSelC4Br | 9.60<br>(9.91)   | 16.40<br>(16.98) | 0.85<br>(0.83) | 69<br>(66.06) | 1800250                                 |
|     |       |           |                  |                  |                |               | ACS Appl. Mater.                        |
| 105 | PBDBT | ArSiID-F  | 9.40<br>(10.82)  | 16.80<br>(18.79) | 0.84<br>(0.85) | 65<br>(66.96) | Interfaces 2019,<br>11, 1125-1134       |
|     |       |           |                  |                  |                |               | ACS Appl. Mater.                        |
| 106 | PBDBT | ArSiID-Cl | 7.90<br>(10.52)  | 16.40<br>(18.73) | 0.79<br>(0.85) | 60<br>(66.88) | Interfaces 2019,<br>11, 1125-1134       |
|     |       |           |                  |                  |                |               | Small, 2023,                            |
| 107 | PM6   | BTP-OE    | 16.27<br>(14.78) | 27.27<br>(24.2)  | 0.81<br>(0.86) | 74<br>(71.42) | 19(30): 2302314                         |
|     |       |           |                  |                  |                |               | Small, 2023,                            |
| 108 | PM6   | Y6BO      | 17.44<br>(15.95) | 26.93<br>(25.29) | 0.83<br>(0.87) | 79<br>(73.4)  | 19(30): 2302314                         |
|     |       |           |                  |                  |                |               | Nat. Commun. 14,                        |
| 109 | PM6   | BTP-eC9   | 19.31<br>(15.96) | 27.88<br>(25.15) | 0.86<br>(0.89) | 80<br>(74.94) | 1760 (2023)                             |
|     |       |           |                  |                  |                |               | Angew. Chem.                            |
| 110 | PM6   | mPh4F-TT  | 16.46<br>(15.73) | 25.00<br>(24.73) | 0.87<br>(0.85) | 76<br>(74.28) | Int. Ed 2022,<br>134(46):<br>e202206930 |
|     |       |           |                  |                  |                |               | Angew. Chem.                            |
| 111 | PM6   | mPh4F-ST  | 17.30<br>(15.87) | 26.83<br>(25.03) | 0.83<br>(0.84) | 78<br>(74.61) | Int. Ed 2022,<br>134(46):               |

|     |     |               |                  |                  |                |               |                                                           |
|-----|-----|---------------|------------------|------------------|----------------|---------------|-----------------------------------------------------------|
|     |     |               |                  |                  |                |               | e202206930                                                |
|     |     |               |                  |                  |                |               | Angew. Chem.                                              |
| 112 | PM6 | mPh4F-TS      | 17.70<br>(15.94) | 27.93<br>(25.12) | 0.82<br>(0.84) | 78<br>(74.61) | Int. Ed 2022,<br>134(46):<br>e202206930                   |
| 113 | PM6 | BTPIC-4EO-4F  | 10.64<br>(13.16) | 20.01<br>(22.39) | 0.77<br>(0.83) | 69<br>(70.1)  | ACS Appl. Mater.<br>Interfaces 2021,<br>13, 5, 6147-6155  |
| 114 | PM6 | BTPIC-4EO-4Cl | 11.29<br>(12.87) | 20.59<br>(22.32) | 0.78<br>(0.82) | 70<br>(70.01) | ACS Appl. Mater.<br>Interfaces 2021,<br>13, 5, 6147-6155  |
| 115 | PM6 | BTPIC-4EO-4Br | 12.41<br>(11.96) | 22.78<br>(21.26) | 0.84<br>(0.83) | 65<br>(67.94) | ACS Appl. Mater.<br>Interfaces 2021,<br>13, 5, 6147-6155  |
| 116 | PM6 | YCF3          | 18.21<br>(14.92) | 27.56<br>(23.87) | 0.86<br>(0.88) | 77<br>(70.72) | ACS Energy Lett.<br>2023, 8, 1, 96-106                    |
| 117 | PM6 | YCH3          | 15.53<br>(14.47) | 25.45<br>(23.52) | 0.87<br>(0.88) | 70<br>(69.59) | ACS Energy Lett.<br>2023, 8, 1, 96-106                    |
| 118 | PM6 | CH-6F         | 16.77<br>(15.66) | 25.31<br>(24.17) | 0.87<br>(0.88) | 76<br>(73.09) | Energy Environ.<br>Sci. 2022, 15(8):<br>3519-3533         |
| 119 | PM6 | CH-4Cl        | 17.72<br>(15.36) | 26.50<br>(24.11) | 0.87<br>(0.87) | 77<br>(73.01) | Energy Environ.<br>Sci. 2022, 15(8):<br>3519-3533         |
| 120 | PM6 | CH-Cl         | 17.22<br>(15.36) | 26.07<br>(23.85) | 0.87<br>(0.87) | 76<br>(72.45) | Energy Environ.<br>Sci. 2022, 15(8):<br>3519-3533         |
| 121 | PM6 | Y6-sch        | 14.19<br>(14.44) | 22.76<br>(23.45) | 0.84<br>(0.86) | 74<br>(71.44) | Org. Electron<br>2023, 114: 10673                         |
| 122 | PM6 | Y11           | 15.27<br>(15.04) | 24.62<br>(23.75) | 0.84<br>(0.86) | 73<br>(70.22) | Sci. China Chem.<br>2020, 63: 1159-<br>1168               |
| 123 | PM6 | BT-BO-LIC     | 9.28<br>(14.20)  | 18.41<br>(23.2)  | 0.90<br>(0.88) | 56<br>(69.33) | Adv. Energy<br>Mater. 2022,<br>12(1): 2102172             |
| 124 | PM6 | BT-BO-L4F     | 16.17<br>(15.23) | 27.62<br>(24.91) | 0.83<br>(0.86) | 71<br>(71.06) | Adv. Energy<br>Mater. 2022,<br>12(1): 2102172             |
| 125 | PM6 | SYSS-Cl       | 16.73<br>(15.65) | 25.85<br>(25.23) | 0.86<br>(0.84) | 75<br>(73.31) | Angew. Chem.<br>Int. Ed 2021,<br>133(35): 19390-<br>19401 |
| 126 | PM6 | S-WSeSe-Cl    | 16.01<br>(15.41) | 26.35<br>(24.9)  | 0.83<br>(0.83) | 73<br>(73.78) | Angew. Chem.<br>Int. Ed 2021,                             |

|     |       |           |                  |                  |                |               |                                                                     |
|-----|-------|-----------|------------------|------------------|----------------|---------------|---------------------------------------------------------------------|
|     |       |           |                  |                  |                |               | 133(35): 19390-19401<br>Mater. Chem.<br>Front. 2020, 4(8): 2428-243 |
| 127 | PM6   | Y6-4Cl    | 16.06<br>(14.50) | 25.85<br>(23.91) | 0.84<br>(0.85) | 74<br>(71.38) | Mater. Chem.<br>Front. 2020, 4(8): 2428-243                         |
| 128 | PM6   | N3-4Cl    | 16.53<br>(13.90) | 25.90<br>(23.56) | 0.85<br>(0.83) | 75<br>(70.28) | Mater. Chem.<br>Front. 2020, 4(8): 2428-243                         |
| 129 | PM6   | TPQx-4F   | 6.78<br>(13.01)  | 13.50<br>(21.53) | 0.95<br>(0.89) | 53<br>(66.67) | Mater. Chem.<br>Front. 2020, 4(11): 3310-3318                       |
| 130 | PM6   | TPQx-6F   | 12.10<br>(13.90) | 20.36<br>(22.67) | 0.92<br>(0.89) | 64<br>(68.55) | Mater. Chem.<br>Front. 2020, 4(11): 3310-3318                       |
| 131 | PM6   | M3        | 14.40<br>(13.41) | 22.40<br>(21.59) | 0.89<br>(0.87) | 72<br>(70.74) | New J Chem.<br>2024, 48(9): 3974-3983                               |
| 132 | PM6   | POR-1N    | 9.55<br>(10.30)  | 15.38<br>(17.07) | 1.07<br>(0.98) | 58<br>(61.08) | J. Mater. Chem. C<br>2022, 10(6): 1977-198                          |
| 133 | PM6   | POR-2F    | 15.18<br>(12.12) | 21.25<br>(19.42) | 0.97<br>(0.93) | 73<br>(66.76) | J. Mater. Chem. C<br>2022, 10(6): 1977-198                          |
| 134 | PM6   | ITOR-IC   | 9.51<br>(9.93)   | 15.41<br>(16.21) | 0.99<br>(0.96) | 62<br>(63.68) | Sol. Energy 2022,<br>236: 206-214                                   |
| 135 | PM6   | ITOR4F-IC | 8.09<br>(9.8)    | 13.98<br>(16.06) | 0.96<br>(0.96) | 60<br>(63.48) | Sol. Energy 2022,<br>236: 206-214                                   |
| 136 | PM6   | ITOR-IC4F | 11.10<br>(11.75) | 18.05<br>(18.56) | 0.90<br>(0.91) | 68<br>(69.36) | Sol. Energy 2022,<br>236: 206-214                                   |
| 137 | PBDBT | F-2Cl     | 10.31<br>(10.72) | 18.92<br>(18.73) | 0.74<br>(0.84) | 73<br>(68.12) | ACS Appl. Mater.<br>Interfaces 2021,<br>13, 34, 40766-40777         |
| 138 | PM6   | BDTBO-4F  | 14.83<br>(13.85) | 23.03<br>(22.26) | 0.86<br>(0.87) | 75<br>(71.35) | ACS Appl. Mater.<br>Interfaces 2020,<br>12, 46, 51776-51784         |
| 139 | PM6   | BDTBP-4Cl | 13.87<br>(13.55) | 23.59<br>(22.19) | 0.83<br>(0.85) | 71<br>(71.27) | ACS Appl. Mater.<br>Interfaces 2020,<br>12, 46, 51776-51784         |
| 140 | PBDBT | IDTTA     | 10.90<br>(10.64) | 14.90<br>(16.38) | 0.98<br>(0.92) | 69<br>(68.74) | J. Mater. Chem. A<br>2020, 8: 1164-1175                             |

|     |       |            |                  |                  |                |               |                                             |
|-----|-------|------------|------------------|------------------|----------------|---------------|---------------------------------------------|
| 141 | PBDBT | DTCFO-ICF  | 6.80<br>(9.89)   | 15.52<br>(17.68) | 0.81<br>(0.87) | 54<br>(63.54) | J. Mater. Chem. C<br>2021, 9: 3295-<br>3306 |
| 142 | PBDBT | DTCFO-ICCI | 8.55<br>(9.59)   | 16.69<br>(17.62) | 0.77<br>(0.85) | 67<br>(63.45) | J. Mater. Chem. C<br>2021, 9: 3295-<br>3306 |
| 143 | PM6   | DTCFO-ICF  | 7.67<br>(10.45)  | 15.44<br>(18.31) | 0.99<br>(0.9)  | 50<br>(62.52) | J. Mater. Chem.<br>C 2021, 9: 3295-<br>3306 |
| 144 | PM6   | DTCFO-ICCI | 11.03<br>(10.15) | 18.80<br>(18.25) | 0.93<br>(0.88) | 63<br>(62.43) | J. Mater. Chem.<br>C 2021, 9: 3295-<br>3306 |

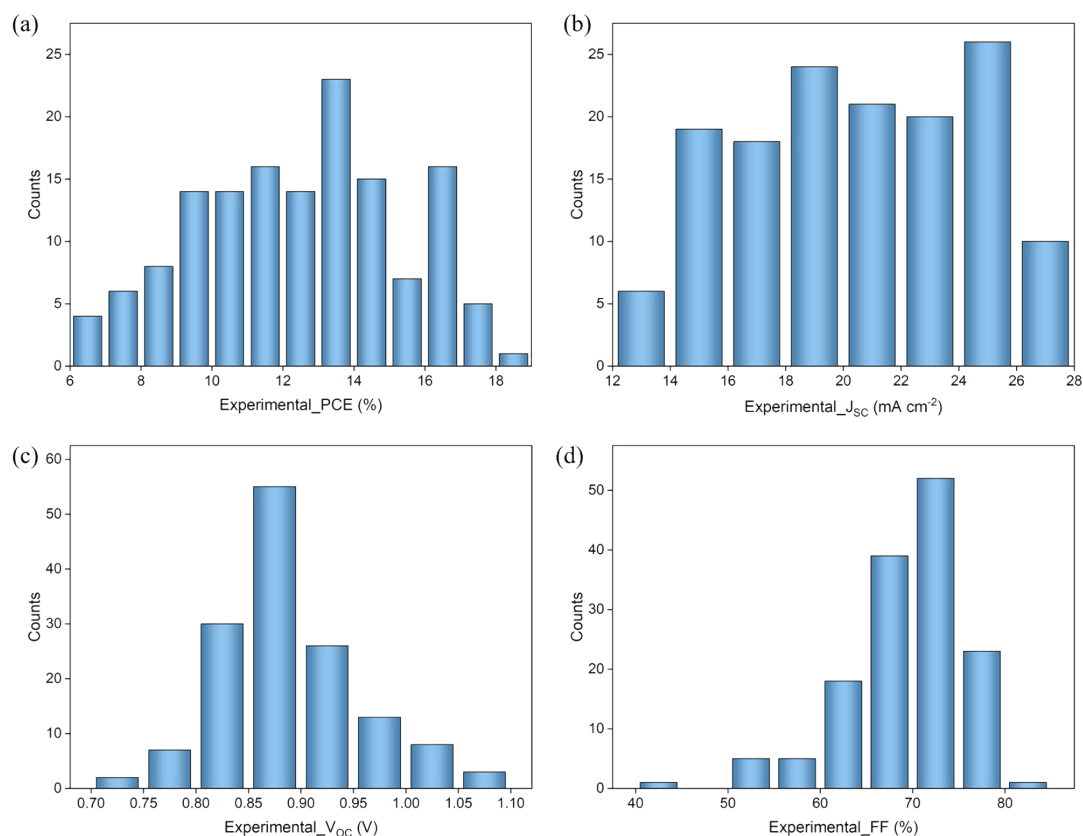

**Fig. S1** Data distribution of experimental (a) PCE, (b)  $J_{sc}$ , (c)  $V_{oc}$  and (d) FF in the original dataset.

The range (average) of PCE,  $J_{sc}$ ,  $V_{oc}$  and FF are 6.46% ~ 19.31% (12.47%), 12.20 mA.cm<sup>-2</sup> ~ 27.88 mA.cm<sup>-2</sup> (20.40 mA.cm<sup>-2</sup>), 0.74 V ~ 1.07 V (0.88 V) and 43% ~ 80%

(68.87%), respectively.

**Diagram. S1** Labelled fragments of acceptors in sorted Unit 1/2/3/4 according to the dividing scheme in Fig. 2.

### Fragments (28) in Unit 1

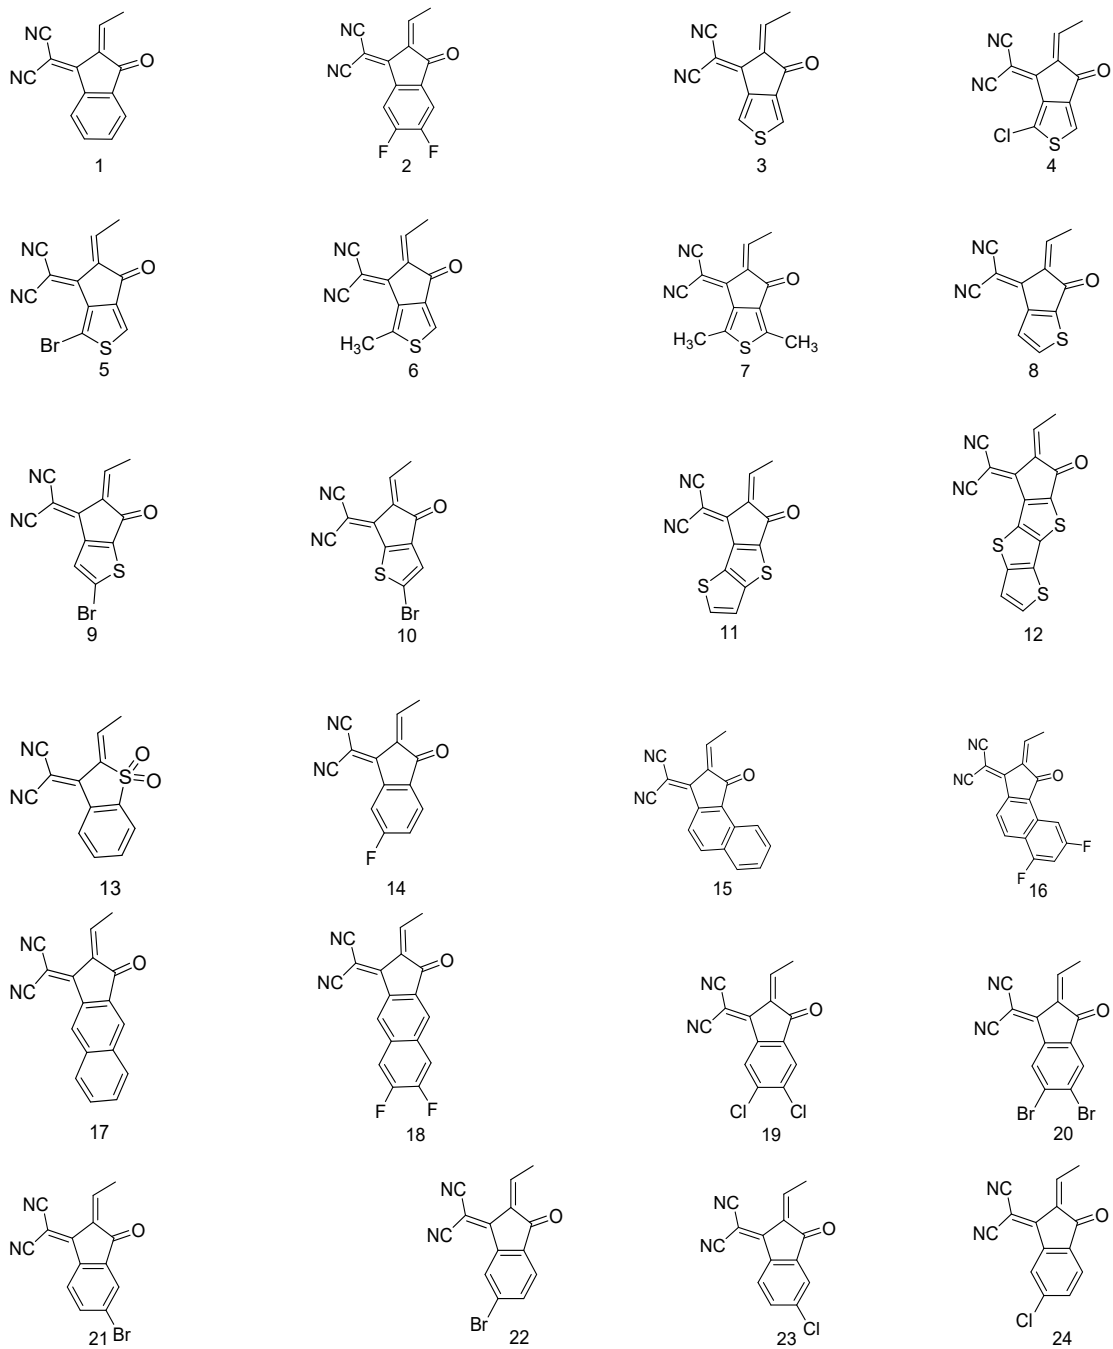

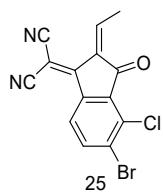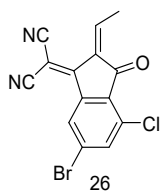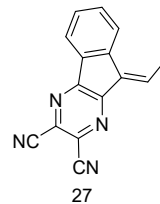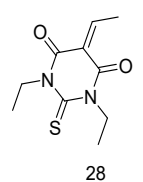

**Fragments (25) in Unit 2**

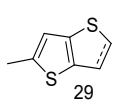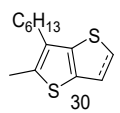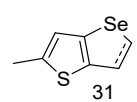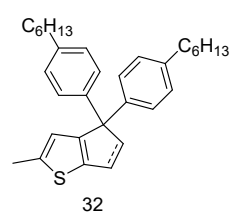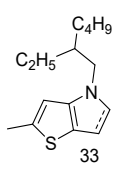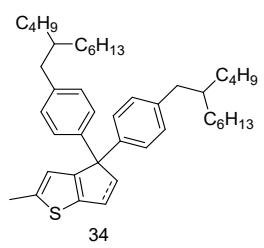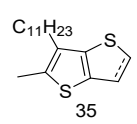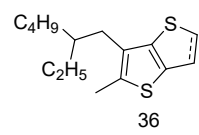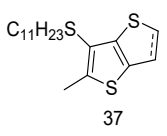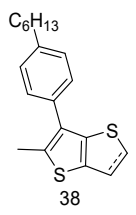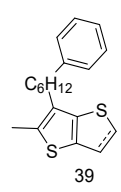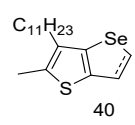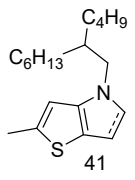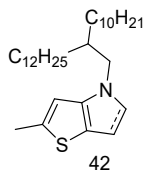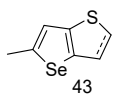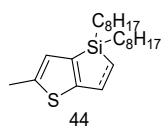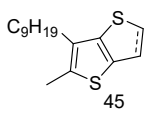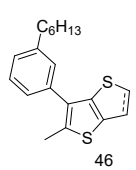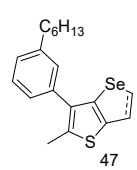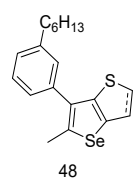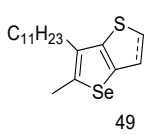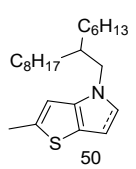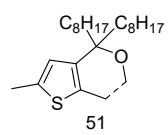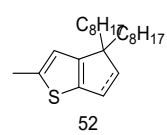

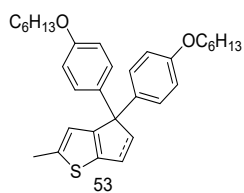

### Fragments (30) in Unit 3

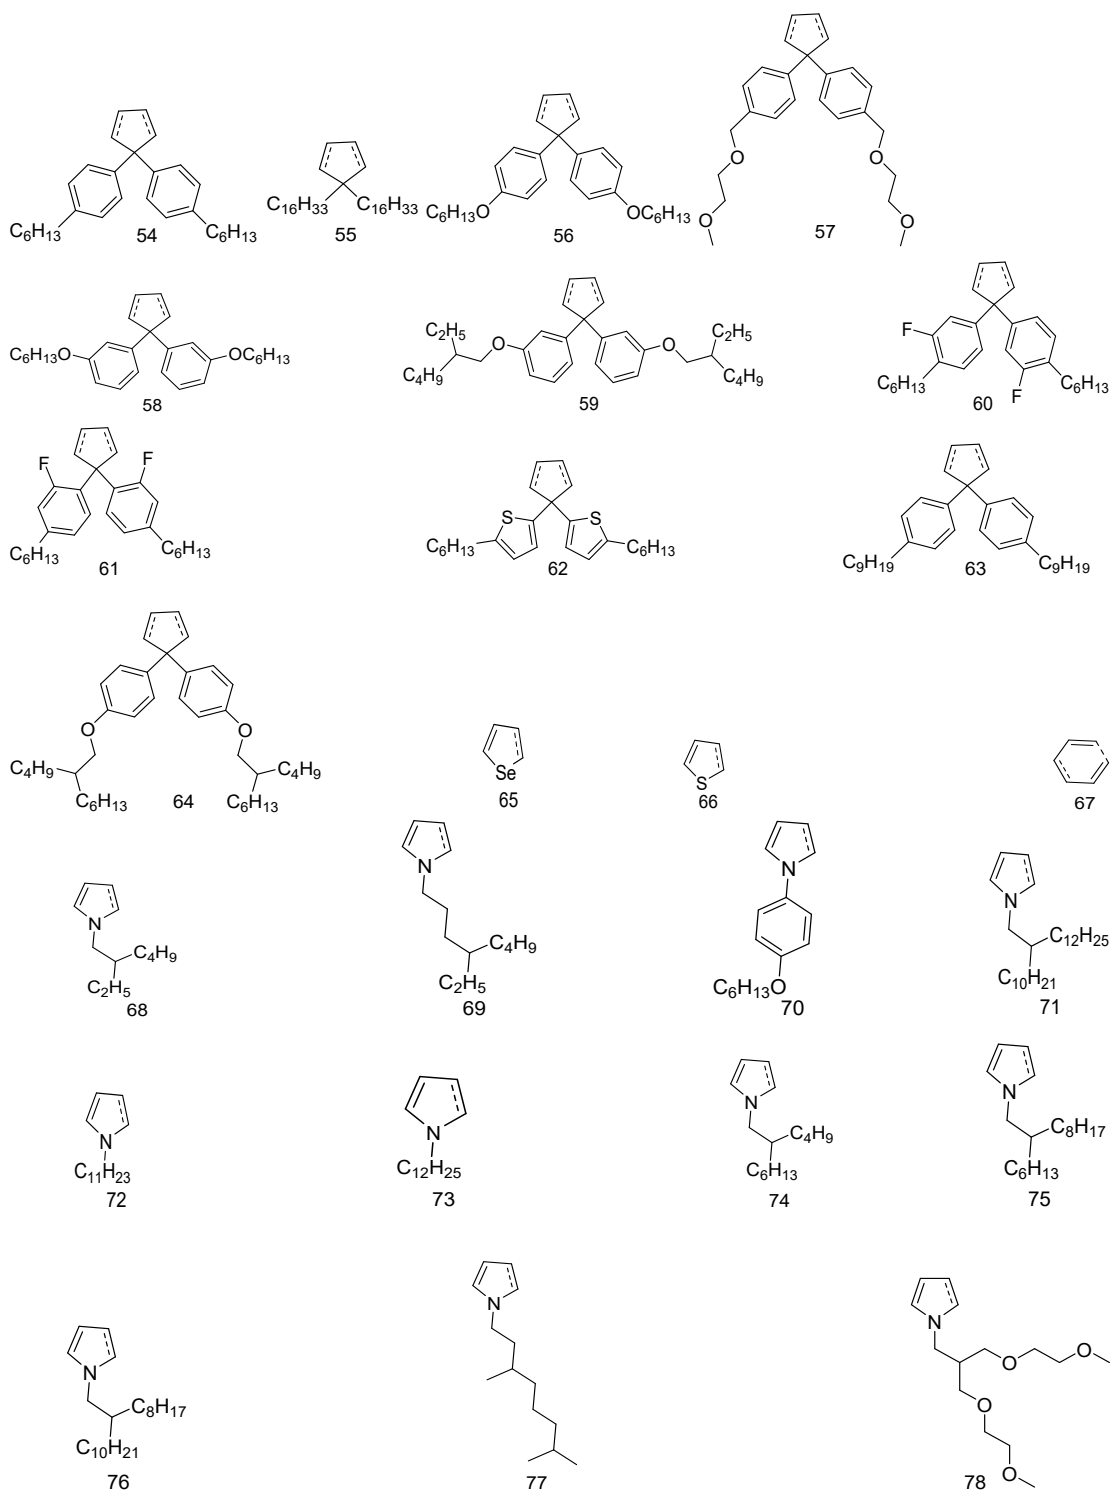

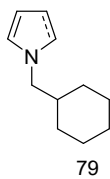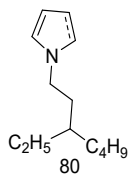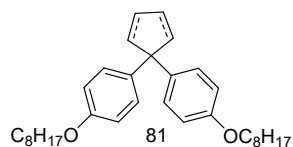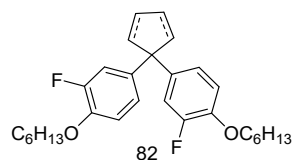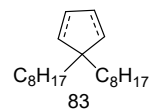

### Fragments (31) in Unit 4

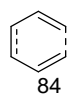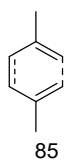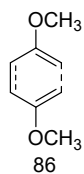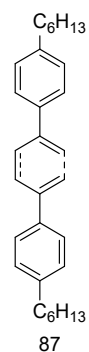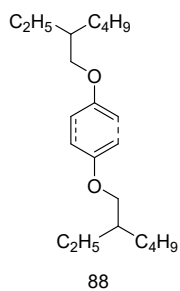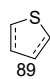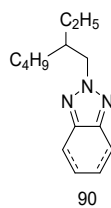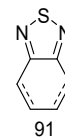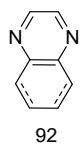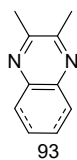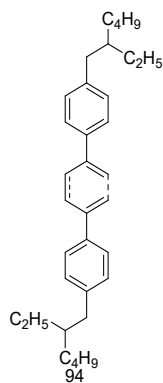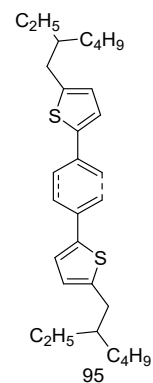

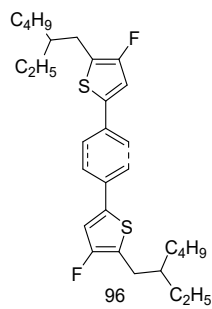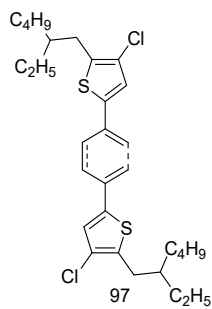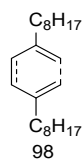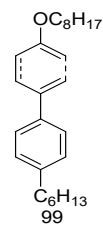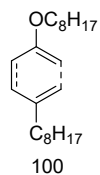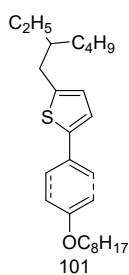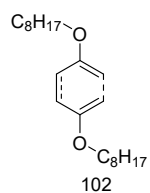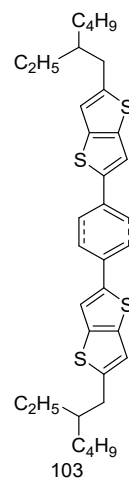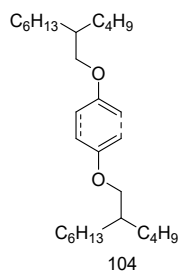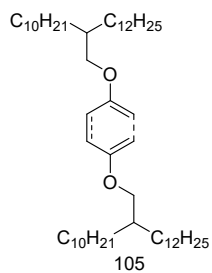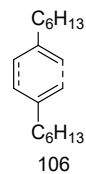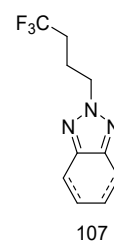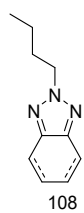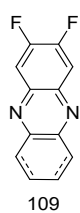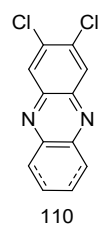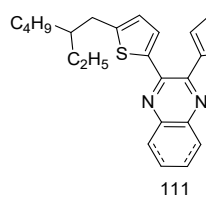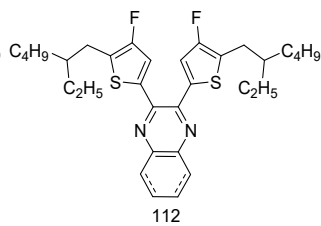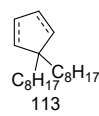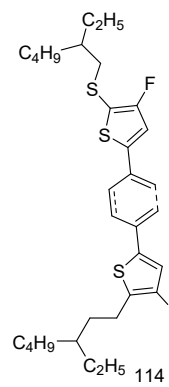

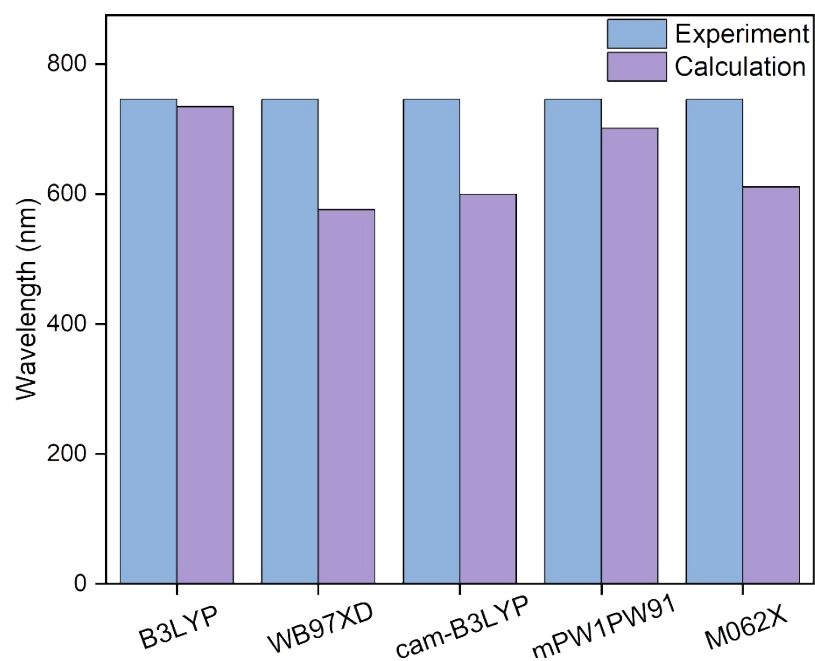

**Fig. S2** Maximum absorption wavelength of A7 molecule computed at five standard exchange-correlation functionals with the 6-31G(d,p) basis set.

**Table. S2** RR model underestimates the top 20% experimental PCE (in parenthesis) in the original dataset. Note that the donor paired with the acceptor is PM6.

|                   |               |               |               |               |
|-------------------|---------------|---------------|---------------|---------------|
| Acceptor          |               |               |               |               |
| Predicted PCE (%) | 15.96 (19.31) | 14.92 (18.21) | 15.36 (17.72) | 15.94 (17.7)  |
| Acceptor          |               |               |               |               |
| Predicted PCE (%) | 15.95 (17.44) | 15.87 (17.3)  | 15.1 (17.22)  | 15.37 (16.8)  |
| Acceptor          |               |               |               |               |
| Predicted PCE (%) | 16.39 (16.77) | 15.91 (16.73) | 14.98 (16.7)  | 14.65 (16.6)  |
| Acceptor          |               |               |               |               |
| Predicted PCE (%) | 13.92 (16.53) | 14.7 (16.5)   | 15.73 (16.46) | 14.79 (16.3)  |
| Acceptor          |               |               |               |               |
| Predicted PCE (%) | 14.78 (16.27) | 14.74 (16.2)  | 15.23 (16.17) | 14.5 (16.06)  |
| Acceptor          |               |               |               |               |
| Predicted PCE (%) | 14.01 (16.02) | 15.41 (16.01) | 14.17 (16)    | 14.47 (15.53) |
| Acceptor          |               |               |               |               |
| Predicted PCE (%) | 14.78 (15.5)  | 15.15 (15.5)  | 15.04 (15.27) | 14.49 (15.2)  |
| Acceptor          |               |               |               |               |
| Predicted PCE (%) | 12.12 (15.18) | 14.28 (15)    | 14.37 (14.9)  |               |

## Reference

1. P. Song, Y. Li, F. Ma, T. Pullerits and M. Sun, *Chem. Rec.*, 2016, **16**, 734-753.
2. E. M. Kadilenko and R. Grinis, *J. Phys. Chem. A.*, 2025, **129**, 6694-6702.
3. M. E. Köse, W. J. Mitchell, N. Kopidakis, C. H. Chang, S. E. Shaheen, K. Kim and G. Rumbles, *J. Am. Chem. Soc.*, 2007, **129**, 14257-14270.
4. M. Kuss-Petermann and O. S. Wenger, *J. Am. Chem. Soc.*, 2016, **138**, 1349-1358.
5. T. Caronna, S. Morrocchi and B. M. Vittimberga, *J. Am. Chem. Soc.*, 1986, **108**, 2205-2208.
6. X. Zhang, L. Chi, S. Ji, Y. Wu, P. Song, K. Khan, H. Guo, T. D. James and J. Zhao, *J. Am. Chem. Soc.*, 2009, **131**, 17452-17463.
7. Q. Lu, M. Qiu, M. Zhao, Z. Li and Y. Li, *Polymers.*, 2019, **11**, 958.
